# Supplementary material for: Fate of transition metals in PO4-based in vitro assays: equilibrium modeling and macroscopic studies
Source: Royal Society of Chemistry journal article supplement (doi:10.1039/d0em00405g), 2020-12-21
Supplement: d0em00405g1.pdf [file d0em00405g1.pdf]

## Supporting Information

### Fate of Transition Metals in PO<sub>4</sub>-based *in vitro* Assays: Equilibrium Modeling and Macroscopic Studies

B. E. Reed, J. Yalamanchili, J. B. Leach, and C. J. Hennigan

Table S1 Thermodynamic Data for Fe(III)

Table S2 Thermodynamic Data for Fe(II)

Table S3 Thermodynamic Data for Cu(II) and Cu(I)

Table S4 Thermodynamic Data for Mn(II), Mn(III) and Mn(IV)

Table S5. Modeling Procedures for Each Task Based on the Steps Employed in *MINEQL*.

Table S6. Results from Triplicates of Macro-Studies

Table S7. Dominant Species at pH = 7.4 with and without Precipitation

Figure S1. HACH calibration curves for (a) Fe, (b) Cu and (c) Mn

Figure S2. Fe(III) macroscopic experiments with and without DTT.

Figure S3. Fe(II) macroscopic experiments with and without DTT.

Figure S4. Cu(II) macroscopic experiments with and without DTT.

Figure S5. Mn(II) macroscopic experiments with and without DTT.

Figure S6. Effect of  $K_{so}$  on metal solubilities on selected precipitates.

Figure S7. Effect of pH on metal speciation (a) Fe(III), (b) Fe(II), (c) Cu(II) and (d) Mn(II)

Figure S8. Fe(III) solubility versus TOTPO<sub>4</sub> for strengite- lepidocrocite

Figure S9. Fe(III) solubility versus TOTPO<sub>4</sub> for strengite-ferrihydrite (red) and strengite-maghemite (blue)

Figure S10. Effect of P<sub>O<sub>2</sub></sub> on metal speciation: (a) Fe(II)-Fe(III), (b) Cu(I)-Cu(II) and (c) Mn(II)-Mn(III)-  
Mn(IV)

Figure S11. Adsorption of Cu(II) and Mn(II) by HFO: Function of Fe(III) concentration. TOTCu(II) =  
TOTMn(II) = 5 μM

**Table S1 Thermodynamic Data for Fe(III)**

| Name           | H2O | H+ | CO3 2- | Fe 3+ | PO4 3- | log k   | delta H |
|----------------|-----|----|--------|-------|--------|---------|---------|
| <b>Aqueous</b> |     |    |        |       |        |         |         |
| Fe3(OH)4 +5    | 4   | -4 | 0      | 3     | 0      | -6.288  | 15.593  |
| Fe(OH) 4-      | 4   | -4 | 0      | 1     | 0      | -21.588 | 0       |
| Fe(OH)3        | 3   | -3 | 0      | 1     | 0      | -12.56  | 24.809  |
| Fe2(OH)2 +4    | 2   | -2 | 0      | 2     | 0      | -2.854  | 13.771  |
| Fe(OH) 2+      | 2   | 2  | 0      | 1     | 0      | -4.954  | 0       |
| FeOH+2         | 1   | -1 | 0      | 1     | 0      | -2.187  | 9.993   |
| FeHPO4+        | 0   | 1  | 0      | 1     | 1      | 22.292  | -7.3    |
| FeH2PO4 +2     | 0   | 2  | 0      | 1     | 1      | 23.852  | 0       |
| <b>Solids</b>  |     |    |        |       |        |         |         |
| GOETHITE       | 2   | -3 | 0      | 1     | 0      | -0.491  | 14.48   |
| LEPIDOCROCITE  | 2   | -3 | 0      | 1     | 0      | -1.371  | 0       |
| HEMATITE       | 3   | -6 | 0      | 2     | 0      | 1.418   | 30.829  |
| FERRIHYDRITE   | 3   | -3 | 0      | 1     | 0      | -3.191  | 17.573  |
| MAGHEMITE      | 3   | -6 | 0      | 2     | 0      | -6.386  | 0       |
| STRENGITE      | 2   | 0  | 0      | 1     | 1      | 26.4    | 2.237   |

Table S2 Thermodynamic Data for Fe(II)

| Name           | H2O | H+ | CO3 2- | Fe 2+ | PO4 3- | log k   | delta H |
|----------------|-----|----|--------|-------|--------|---------|---------|
| <b>Aqueous</b> |     |    |        |       |        |         |         |
| FeOH+          | 1   | -1 | 0      | 1     | 0      | -9.397  | 13.339  |
| Fe(OH)2        | 2   | -2 | 0      | 1     | 0      | -20.494 | 28.59   |
| Fe(OH) 3-      | 3   | -3 | 0      | 1     | 0      | -28.991 | 30.218  |
| FeHCO3+        | 0   | 1  | 1      | 1     | 0      | 11.429  | 0       |
| FeH2PO4+       | 0   | 2  | 0      | 1     | 1      | 22.273  | 0       |
| FeHPO4         | 0   | 1  | 0      | 1     | 1      | 15.975  | 0       |
| <b>Solids</b>  |     |    |        |       |        |         |         |
| WUSITE         | 1   | -2 | 0      | 0.95  | 0      | -11.688 | 24.842  |
| Fe(OH)2        | 2   | -2 | 0      | 1     | 0      | -13.564 | 0       |
| VIVIANITE      | 8   | 0  | 0      | 3     | 2      | 36      | 0       |
| SIDERITE       | 0   | 0  | 1      | 1     | 0      | 10.24   | 3.824   |
| Fe3(PO4)2      | 0   | 0  | 0      | 3     | 2      | 36      | 0       |

Table S3 Thermodynamic Data for Cu(II) and Cu(I)

| Name               | H2O | H+ | CO3 2- | Cu 2+ | PO4 3- | log k   | delta H |
|--------------------|-----|----|--------|-------|--------|---------|---------|
| <b>Aqueous</b>     |     |    |        |       |        |         |         |
| Cu(OH)2            | 2   | -2 | 0      | 1     | 0      | -16.194 | 0       |
| Cu2(OH)2<br>+2     | 2   | -2 | 0      | 2     | 0      | -10.594 | 18.313  |
| Cu(OH)4 -2         | 4   | -4 | 0      | 1     | 0      | -39.98  | 0       |
| Cu(OH)+            | 1   | -1 | 0      | 1     | 0      | -7.497  | 8.559   |
| Cu(OH) 3-          | 3   | -3 | 0      | 1     | 0      | -26.879 | 0       |
| CuHCO3 +           | 0   | 1  | 1      | 1     | 0      | 12.129  | 0       |
| CuCO3              | 0   | 0  | 1      | 1     | 0      | 6.77    | 0       |
| Cu(CO3)2 -2        | 0   | 0  | 2      | 1     | 0      | 10.2    | 0       |
| CuHPO4             | 0   | 1  | 0      | 1     | 1      | 16.5    | 0       |
| <b>Solids</b>      |     |    |        |       |        |         |         |
| AZURITE            | 2   | -2 | 2      | 3     | 0      | 16.906  | 22.758  |
| MALACHITE          | 2   | -2 | 1      | 2     | 0      | 5.306   | -18.255 |
| TENORITE           | 1   | -2 | 0      | 1     | 0      | -7.644  | 15.504  |
| Cu(OH)2            | 2   | -2 | 0      | 1     | 0      | -8.674  | 13.485  |
| Cu3(PO4)2<br>:3H2O | 3   | 0  | 0      | 3     | 2      | 35.12   | 0       |
| CuCO3              | 0   | 0  | 1      | 1     | 1      | 11.5    | 0       |
| Cu3(PO4)2          | 0   | 0  | 0      | 3     | 2      | 36.85   | 0       |
|                    |     |    |        |       |        |         |         |
|                    |     |    |        |       |        |         |         |
| <b>Cu(I)</b>       |     |    |        |       |        |         |         |
| CUPRITE            | 1   | -2 | 0      | S     | 0      | 1.406   | 29.642  |

Table S4 Thermodynamic Data for Mn(II), Mn(III) and Mn(IV)

| Name           | H2O | H+ | CO3 2- | Mn 2+ | PO4 3- | log k   | delta H |
|----------------|-----|----|--------|-------|--------|---------|---------|
| <b>Aqueous</b> |     |    |        |       |        |         |         |
| Mn(OH)4 -2     | 4   | -4 | 0      | 1     | 0      | -48.28  | 0       |
| MnOH+          | 1   | -1 | 0      | 1     | 0      | -10.597 | 13.339  |
| Mn(OH) 3-      | 3   | -3 | 0      | 1     | 0      | -34.8   | 0       |
| MnHCO 3+       | 0   | 1  | 1      | 1     | 0      | 11.629  | -2.534  |
| MnCO3          | 0   | 0  | 1      | 1     | 0      | 4.7     | 0       |
| MnHPO4         | 0   | 1  | 0      | 1     | 1      | 15.8    | 0       |
| <b>Solids</b>  |     |    |        |       |        |         |         |
| PYROCHROITE    | 2   | -2 | 0      | 1     | 0      | -15.194 | 23.186  |
| MnHPO4         | 0   | 1  | 0      | 1     | 1      | 25.4    | 0       |
| RHODOCHROSITE  | 0   | 0  | 1      | 1     | 0      | 10.58   | 0.449   |
| Mn3(PO4)2      | 0   | 0  | 0      | 3     | 2      | 23.827  | -2.12   |
|                |     |    |        |       |        |         |         |
|                |     |    |        |       |        |         |         |
| <b>Mn(III)</b> |     |    |        |       |        |         |         |
|                | H2O | H+ | CO3 2- | Mn 3+ | PO4 3- | log k   | delta H |
| BIXBYITE       | 3   | -6 | 0      | 2     | 0      | 0.644   | 29.754  |
|                |     |    |        |       |        |         |         |
| <b>Mn(IV)</b>  |     |    |        |       |        |         |         |
|                | H2O | H+ | CO3 2- | Mn 2+ | PO4 3- | log k   | delta H |
| MANGANITE      | 2   | -3 | 0      | 1     | 0      | -25.34  | 0       |

**Table S5. Modeling Procedures for Each Task Based on the Steps Employed in *MINEQL*.**

| <b>Steps</b> |                             | <b>Precipitate Type and Resulting Solubility</b>                                   |
|--------------|-----------------------------|------------------------------------------------------------------------------------|
| 1            | Select components:          | Metal ion, PO <sub>4</sub> (3-), CO <sub>3</sub> (2-), H(+), H <sub>2</sub> O      |
| 2            | Scan Thermo                 |                                                                                    |
| 3            | Wizard                      |                                                                                    |
| 4            | Totals:                     | PO <sub>4</sub> (3-)= 0.1M or 0 M, Metal: fixed solid                              |
|              | pH:                         | pH is supplied by user =7.4                                                        |
|              | CO <sub>2</sub> :           | closed to the atmosphere TOTCO <sub>3</sub> = 1.4e-4M                              |
|              | Fixed ions:                 | no selection                                                                       |
|              | Solids mover:               | each solid is individually chosen as 'fixed solid' and others are 'not considered' |
|              | Redox:                      |                                                                                    |
| 5            | Ionic Strength corrections: | Fixed= 0.22 μ (molar)                                                              |
|              | Temperature corrections:    | On= 37 °C                                                                          |
| 6            | Run                         | Single                                                                             |

| <b>Steps</b> |                             | <b>Effect of pH</b>                                                               |
|--------------|-----------------------------|-----------------------------------------------------------------------------------|
| 1            | Select components:          | Metal ion, PO <sub>4</sub> (3-), CO <sub>3</sub> (2-), H(+), H <sub>2</sub> O     |
| 2            | Scan Thermo                 |                                                                                   |
| 3            | Wizard                      |                                                                                   |
| 4            | Totals:                     | PO <sub>4</sub> (3-)= 0.1M, Metal= 5e-6M; (use 50e-6M for Fe(2+) and Fe(3+) only) |
|              | pH:                         | pH is supplied by user =7.4                                                       |
|              | CO <sub>2</sub> :           | closed to the atmosphere TOTCO <sub>3</sub> = 1.4e-4M                             |
|              | Fixed ions:                 | no selection                                                                      |
|              | Solids mover:               | Chosen solids as 'dissolved solids' and others are 'not considered'               |
|              |                             | all as 'not considered' for no solids                                             |
|              | Redox:                      |                                                                                   |
| 5            | Ionic Strength corrections: | Fixed= 0.22 μ (molar)                                                             |
|              | Temperature corrections:    | On= 37 °C                                                                         |
| 6            | Run                         | Multirun: pH 5-10, 51points                                                       |

**Table S5, Continued**

| <b>Steps</b> |                             | <b>Effect of PO4</b>                                                 |
|--------------|-----------------------------|----------------------------------------------------------------------|
| 1            | Select components:          | Metal ion, PO4(3-), CO3(2-), H(+), H2O                               |
| 2            | Scan Thermo                 |                                                                      |
| 3            | Wizard                      |                                                                      |
| 4            | Totals:                     | PO4(3-)= 0.1M, Metal= 5e-6M; (use 50e-6M for Fe(2+) and Fe(3+) only) |
|              | pH:                         | pH is supplied by user =7.4                                          |
|              | CO2:                        | closed to the atmosphere TOTCO3= 1.4e-4M                             |
|              | Fixed ions:                 | no selection                                                         |
|              | Solids mover:               | Chosen solids as 'dissolved solids' and others are 'not considered'  |
|              |                             | all as 'not considered' for no solids                                |
|              | Redox:                      |                                                                      |
| 5            | Ionic Strength corrections: | Fixed= 0.22 μ (molar)                                                |
|              | Temperature corrections:    | On= 37 °C                                                            |
| 6            | Run                         | Multirun: PO4 concentration 1e-5-0.5M, 255 points                    |

| <b>Steps</b> |                             | <b>Redox (controlled by pO2)</b>                                                           |
|--------------|-----------------------------|--------------------------------------------------------------------------------------------|
| 1            | Select components:          | Metal ions (couple), PO4(3-), CO3(2-), H(+), H2O, e(-)                                     |
| 2            | Scan Thermo                 |                                                                                            |
| 3            | Wizard                      |                                                                                            |
| 4            | Totals:                     | PO4(3-)= 0.1M, Metal= 5e-6M; (use 50e-6M for Fe(2+) and Fe(3+) only), Metal couple= 1e-23M |
|              | pH:                         | pH is supplied by user =7.4                                                                |
|              | CO2:                        | closed to the atmosphere TOTCO3= 1.4e-4M                                                   |
|              | Fixed ions:                 | no selection                                                                               |
|              | Solids mover:               | Chosen solids as 'dissolved solids' and others are 'not considered'                        |
|              |                             | all as 'not considered' for no solids                                                      |
|              | Redox:                      | Check gases and ion pairs                                                                  |
|              |                             | O2 (g): -0.677; redox couple                                                               |
| 5            | Ionic Strength corrections: | Fixed= 0.22 μ (molar)                                                                      |
|              | Temperature corrections:    | On= 37 °C                                                                                  |
| 6            | Run                         | Multirun: logPO2 -0.699 to -50 , 100 points                                                |

**Table S5, Continued**

| <b>Steps</b> |                             | <b>Adsorption</b>                                                                                                                                    |
|--------------|-----------------------------|------------------------------------------------------------------------------------------------------------------------------------------------------|
| 1            | Select components:          | Metal ion, PO <sub>4</sub> (3-), CO <sub>3</sub> (2-), H(+), H <sub>2</sub> O, e(-), Surface Opts: Two Layer Model: HFO, Both: weak and strong bonds |
| 2            | Scan Thermo                 |                                                                                                                                                      |
| 3            | Wizard                      |                                                                                                                                                      |
| 4            | Totals:                     | PO <sub>4</sub> (3-)= 0.1M, Metal= 5e-6M                                                                                                             |
|              | pH:                         | pH is supplied by user =7.4                                                                                                                          |
|              | CO <sub>2</sub> :           | closed to the atmosphere TOTCO <sub>3</sub> = 1.4e-4M                                                                                                |
|              | Fixed ions:                 | no selection                                                                                                                                         |
|              | Solids mover:               | all solids as 'not considered'                                                                                                                       |
|              | Redox:                      |                                                                                                                                                      |
| 5            | Ionic Strength corrections: | Fixed= 0.22 μ (molar)                                                                                                                                |
|              | Temperature corrections:    | On= 37 °C                                                                                                                                            |
| 6            | Run                         | Multirun: Fe(III) 5e-6 - 5e-4 M, 100 points                                                                                                          |



**Table S6. Results from Triplicates of Macro-Studies**

| % Precipitation        |                     |                |            |
|------------------------|---------------------|----------------|------------|
| Fe(III), $\mu\text{M}$ | PO <sub>4</sub> , M | Average        | STD        |
| 5                      | 0.1                 | 78.6           | 5.1        |
| 50                     | 0.1                 | 76.4           | 2.9        |
| 500                    | 0.1                 | 95.2           | 0.8        |
| 5000                   | 0.1                 | 97.2           | 1.9        |
| 5000                   | 0.1                 | 95.8           | 0.5        |
| 5000                   | 0.01                | 97.8           | 3.0        |
| 5000                   | 0.00001             | 99.9           | 0.1        |
| 5000                   | 0                   | 98.0           | 3.1        |
|                        |                     | <b>AVG STD</b> | <b>2.2</b> |

| % Precipitation       |                     |                |            |
|-----------------------|---------------------|----------------|------------|
| Mn(II), $\mu\text{M}$ | PO <sub>4</sub> , M | Average        | STD        |
| 50                    | 0.1                 | 5.9            | 1.5        |
| 500                   | 0.1                 | 83.2           | 1.7        |
| 5000                  | 0.1                 | 98.6           | 0.2        |
| 5000                  | 0.1                 | 95.3           | 5.5        |
| 5000                  | 0.01                | 99.0           | 0.1        |
| 5000                  | 0.00001             | 26.0           | 1.7        |
| 5000                  | 0                   | 33.4           | 1.3        |
|                       |                     | <b>AVG STD</b> | <b>1.8</b> |

|                       |                     | % Precipitated |            | % Fe(II)       |            | % Fe(III)      |            |
|-----------------------|---------------------|----------------|------------|----------------|------------|----------------|------------|
| Fe(II), $\mu\text{M}$ | PO <sub>4</sub> , M | Average        | STD        | Average        | STD        | Average        | STD        |
| 5                     | 0.1                 | 69.6           | 2.5        | 0.00           | 0.0        | 30.36          | 2.5        |
| 50                    | 0.1                 | 94.1           | 0.8        | 0.48           | 0.5        | 5.71           | 0.5        |
| 500                   | 0.1                 | 84.5           | 6.2        | 0.32           | 0.3        | 15.14          | 6.2        |
| 5000                  | 0.1                 | 93.5           | 4.3        | 0.22           | 0.0        | 6.28           | 4.3        |
| 5000                  | 0.1                 | 91.9           | 1.6        | 0.22           | 0.0        | 7.87           | 1.7        |
| 5000                  | 0.01                | 83.5           | 3.3        | 0.28           | 0.0        | 16.19          | 3.3        |
| 5000                  | 0.00001             | 82.5           | 0.6        | 14.95          | 2.3        | 2.55           | 1.8        |
| 5000                  | 0                   | 81.0           | 2.0        | 14.60          | 0.7        | 4.38           | 2.1        |
|                       |                     | <b>AVG STD</b> | <b>2.7</b> | <b>AVG STD</b> | <b>0.5</b> | <b>AVG STD</b> | <b>2.8</b> |

| % Precipitation       |                     |                |             |
|-----------------------|---------------------|----------------|-------------|
| Cu(II), $\mu\text{M}$ | PO <sub>4</sub> , M | Average        | STD         |
| 50                    | 0.1                 | 65.3           | 2.7         |
| 500                   | 0.1                 | 91.0           | 0.5         |
| 5000                  | 0.1                 | 99.3           | 0.6         |
| 5000                  | 0.01                | 99.6           | 0.0         |
| 5000                  | 0.00001             | 99.5           | 0.1         |
| 5000                  | 0                   | 99.5           | 0.1         |
|                       |                     | <b>AVG STD</b> | <b>1.01</b> |

**Table S7. Dominant Species at pH = 7.4 with and without Precipitation**

| Precipitation Not Allowed |                                                                 |         | Precipitation Allowed                                              |         |
|---------------------------|-----------------------------------------------------------------|---------|--------------------------------------------------------------------|---------|
| Metal                     | Dominant species                                                | % Total | Dominant species                                                   | % Total |
| Fe(II)                    | $\text{FeHPO}_{4(\text{aq})}/\text{FeH}_2\text{PO}_4^+$         | 85/15   | $\text{Fe}_3(\text{PO}_4)_2(\text{s})$                             | 96      |
| Fe(III)                   | $\text{Fe}(\text{OH})^{2+}/\text{Fe}(\text{OH})_{3(\text{aq})}$ | 50/50   | Strengite ( $\text{FePO}_4 \cdot 2\text{H}_2\text{O}$ )            | 100     |
| Cu(I)                     | $\text{Cu}^+$                                                   | 100     | Cuprite                                                            | 100     |
| Cu(II)                    | $\text{CuHPO}_{4(\text{aq})}$                                   | 98      | $\text{CuHPO}_{4(\text{aq})}/\text{Cu}_3(\text{PO}_4)_2(\text{s})$ | 88/12   |
| Mn(II)                    | $\text{MnHPO}_{4(\text{aq})}/\text{Mn}^{2+}$                    | 95/5    | $\text{MnHPO}_4(\text{s})$                                         | 100     |
| Mn(III)                   | $\text{Mn}^{3+}$                                                | 100     | $\text{MnO}(\text{OH})_{(\text{s})}$                               | 100     |
| Mn(IV)                    | $\text{Mn}^{4+}$                                                | 100     | $\text{MnO}_2(\text{s})$                                           | 100     |

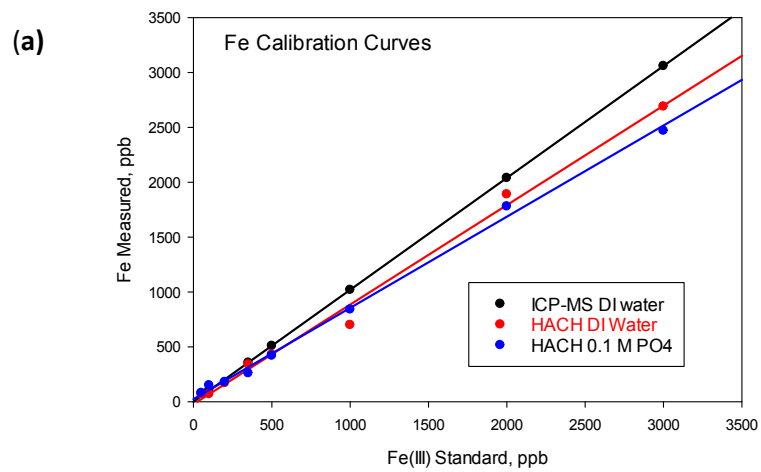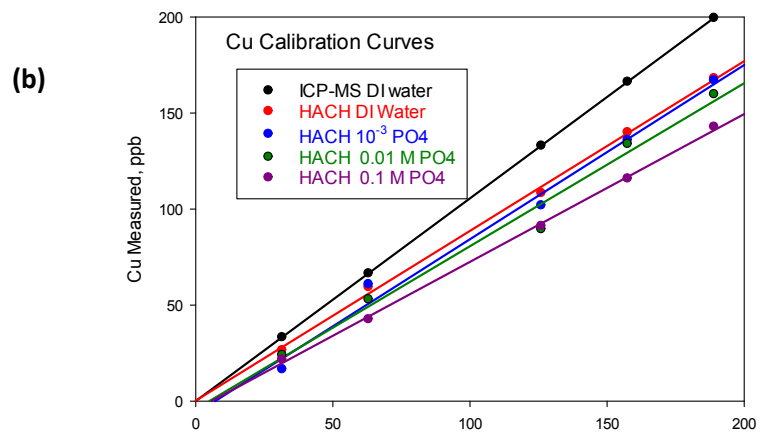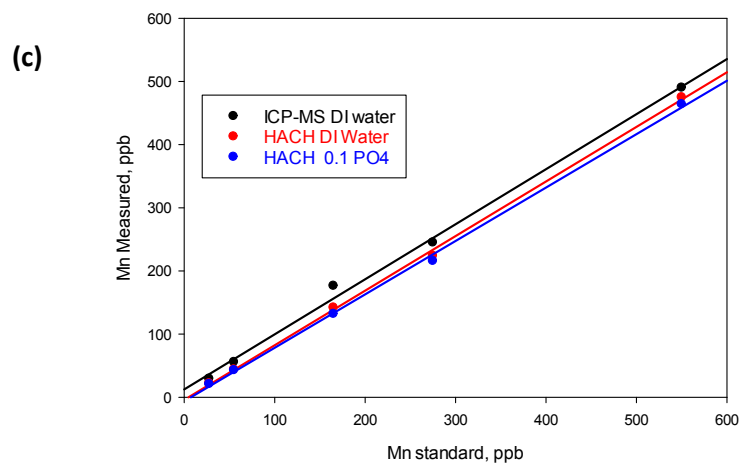

Figure S1. HACH calibration curves for (a) Fe, (b) Cu and (c) Mn

| <p><b>Metal = Fe(III)</b><br/> pH = 7.4<br/> T = 37 °C</p> | <p>Effect of metal concentration in 0.1M phosphate buffer:</p>                                                                                                                                                                                                                                                                                                                  |      |      |      |      |     |     |     |    |     |     |     |     |
|------------------------------------------------------------|---------------------------------------------------------------------------------------------------------------------------------------------------------------------------------------------------------------------------------------------------------------------------------------------------------------------------------------------------------------------------------|------|------|------|------|-----|-----|-----|----|-----|-----|-----|-----|
| <p>In the presence of Dithiothreitol</p>                   | 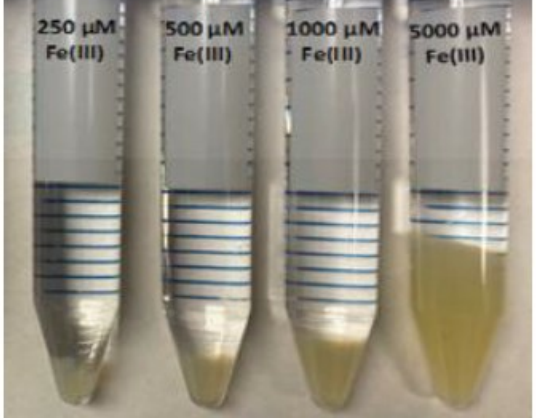                                                                                                                                                                                                                                                                                              |      |      |      |      |     |     |     |    |     |     |     |     |
| <p>In the absence of Dithiothreitol</p>                    |  <table border="1" data-bbox="686 1018 1218 1417"> <thead> <tr> <th>250</th> <th>500</th> <th>1000</th> <th>5000</th> </tr> </thead> <tbody> <tr> <td>400</td> <td>200</td> <td>100</td> <td>20</td> </tr> <tr> <td>96%</td> <td>96%</td> <td>96%</td> <td>99%</td> </tr> </tbody> </table> | 250  | 500  | 1000 | 5000 | 400 | 200 | 100 | 20 | 96% | 96% | 96% | 99% |
| 250                                                        | 500                                                                                                                                                                                                                                                                                                                                                                             | 1000 | 5000 |      |      |     |     |     |    |     |     |     |     |
| 400                                                        | 200                                                                                                                                                                                                                                                                                                                                                                             | 100  | 20   |      |      |     |     |     |    |     |     |     |     |
| 96%                                                        | 96%                                                                                                                                                                                                                                                                                                                                                                             | 96%  | 99%  |      |      |     |     |     |    |     |     |     |     |

Figure S2. Fe(III) macroscopic experiments with and without DTT.

|                                                           |                                                                                                                                                                                                                                                                                                                                                                                                                   |      |      |      |      |     |     |     |    |     |     |     |     |     |     |     |     |
|-----------------------------------------------------------|-------------------------------------------------------------------------------------------------------------------------------------------------------------------------------------------------------------------------------------------------------------------------------------------------------------------------------------------------------------------------------------------------------------------|------|------|------|------|-----|-----|-----|----|-----|-----|-----|-----|-----|-----|-----|-----|
| <p><b>Metal = Fe(II)</b><br/> pH = 7.4<br/> T = 37 °C</p> | <p>Effect of metal concentration in 0.1M phosphate buffer:</p>                                                                                                                                                                                                                                                                                                                                                    |      |      |      |      |     |     |     |    |     |     |     |     |     |     |     |     |
| <p>In the presence of Dithiothreitol</p>                  | 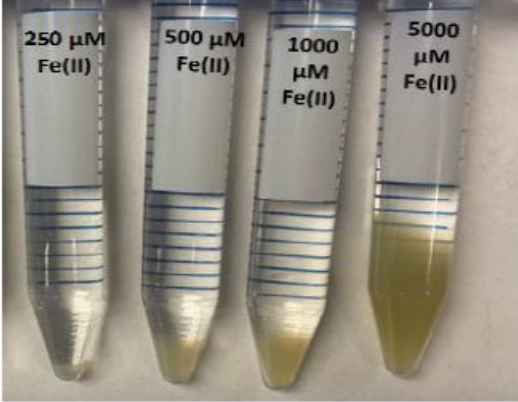                                                                                                                                                                                                                                                                                                                                |      |      |      |      |     |     |     |    |     |     |     |     |     |     |     |     |
| <p>In the absence of Dithiothreitol</p>                   | <table border="1" data-bbox="704 873 1221 1281"> <tr> <td>250</td> <td>500</td> <td>1000</td> <td>5000</td> </tr> <tr> <td>400</td> <td>200</td> <td>100</td> <td>20</td> </tr> <tr> <td>93%</td> <td>83%</td> <td>96%</td> <td>98%</td> </tr> <tr> <td>&lt;1%</td> <td>&lt;1%</td> <td>15%</td> <td>12%</td> </tr> </table>  | 250  | 500  | 1000 | 5000 | 400 | 200 | 100 | 20 | 93% | 83% | 96% | 98% | <1% | <1% | 15% | 12% |
| 250                                                       | 500                                                                                                                                                                                                                                                                                                                                                                                                               | 1000 | 5000 |      |      |     |     |     |    |     |     |     |     |     |     |     |     |
| 400                                                       | 200                                                                                                                                                                                                                                                                                                                                                                                                               | 100  | 20   |      |      |     |     |     |    |     |     |     |     |     |     |     |     |
| 93%                                                       | 83%                                                                                                                                                                                                                                                                                                                                                                                                               | 96%  | 98%  |      |      |     |     |     |    |     |     |     |     |     |     |     |     |
| <1%                                                       | <1%                                                                                                                                                                                                                                                                                                                                                                                                               | 15%  | 12%  |      |      |     |     |     |    |     |     |     |     |     |     |     |     |

Figure S3. Fe(II) macroscopic experiments with and without DTT.

|                                                           |                                                                                      |
|-----------------------------------------------------------|--------------------------------------------------------------------------------------|
| <p><b>Metal = Cu(II)</b><br/> pH = 7.4<br/> T = 37 °C</p> | <p>Effect of metal concentration in 0.1M phosphate buffer:</p>                       |
| <p>In the presence of Dithiothreitol</p>                  |    |
| <p>In the absence of Dithiothreitol</p>                   |  |

Figure S4. Cu(II) macroscopic experiments with and without DTT.

| <p><b>Metal =</b><br/><b>Mn(II)</b><br/>pH = 7.4<br/>T = 37 °C</p> | <p>Effect of metal concentration in 0.1M phosphate buffer:</p>                                                                                                                                                                                                                                                                                                                                                              |                           |                                |     |     |     |     |      |     |      |     |
|--------------------------------------------------------------------|-----------------------------------------------------------------------------------------------------------------------------------------------------------------------------------------------------------------------------------------------------------------------------------------------------------------------------------------------------------------------------------------------------------------------------|---------------------------|--------------------------------|-----|-----|-----|-----|------|-----|------|-----|
| <p>In the presence of Dithiothreitol</p>                           | 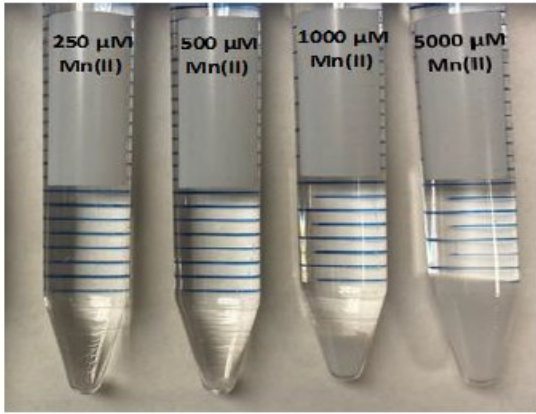                                                                                                                                                                                                                                                                                                                                          |                           |                                |     |     |     |     |      |     |      |     |
| <p>In the absence of Dithiothreitol</p>                            |  <table border="1" data-bbox="719 940 1235 1329"> <thead> <tr> <th>Mn(II) Concentration (μM)</th> <th>Percentage of Mn(II) Remaining</th> </tr> </thead> <tbody> <tr> <td>250</td> <td>29%</td> </tr> <tr> <td>500</td> <td>85%</td> </tr> <tr> <td>1000</td> <td>94%</td> </tr> <tr> <td>5000</td> <td>99%</td> </tr> </tbody> </table> | Mn(II) Concentration (μM) | Percentage of Mn(II) Remaining | 250 | 29% | 500 | 85% | 1000 | 94% | 5000 | 99% |
| Mn(II) Concentration (μM)                                          | Percentage of Mn(II) Remaining                                                                                                                                                                                                                                                                                                                                                                                              |                           |                                |     |     |     |     |      |     |      |     |
| 250                                                                | 29%                                                                                                                                                                                                                                                                                                                                                                                                                         |                           |                                |     |     |     |     |      |     |      |     |
| 500                                                                | 85%                                                                                                                                                                                                                                                                                                                                                                                                                         |                           |                                |     |     |     |     |      |     |      |     |
| 1000                                                               | 94%                                                                                                                                                                                                                                                                                                                                                                                                                         |                           |                                |     |     |     |     |      |     |      |     |
| 5000                                                               | 99%                                                                                                                                                                                                                                                                                                                                                                                                                         |                           |                                |     |     |     |     |      |     |      |     |

Figure S5. Mn(II) macroscopic experiments with and without DTT.

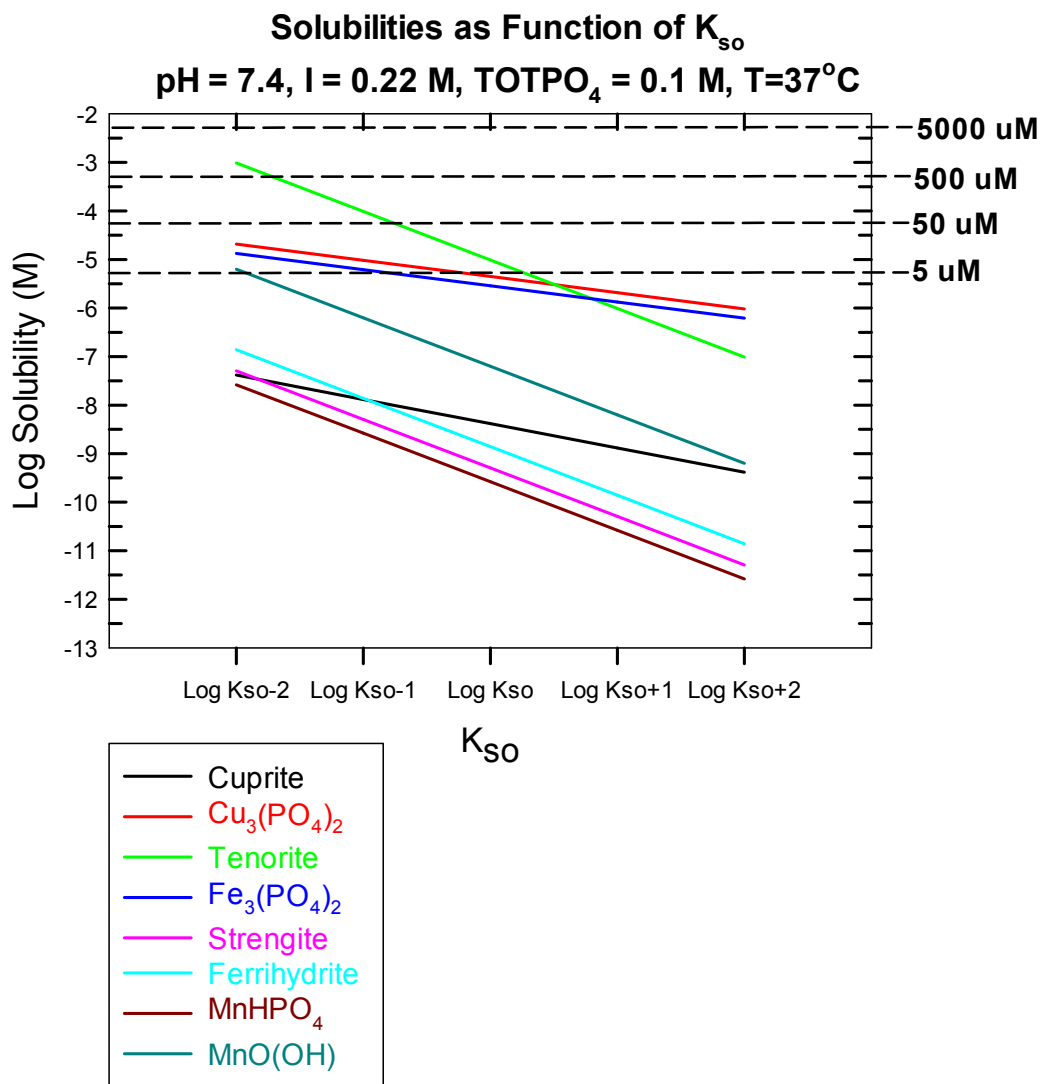

Figure S6. Effect of  $K_{so}$  on metal solubilities on selected precipitates.



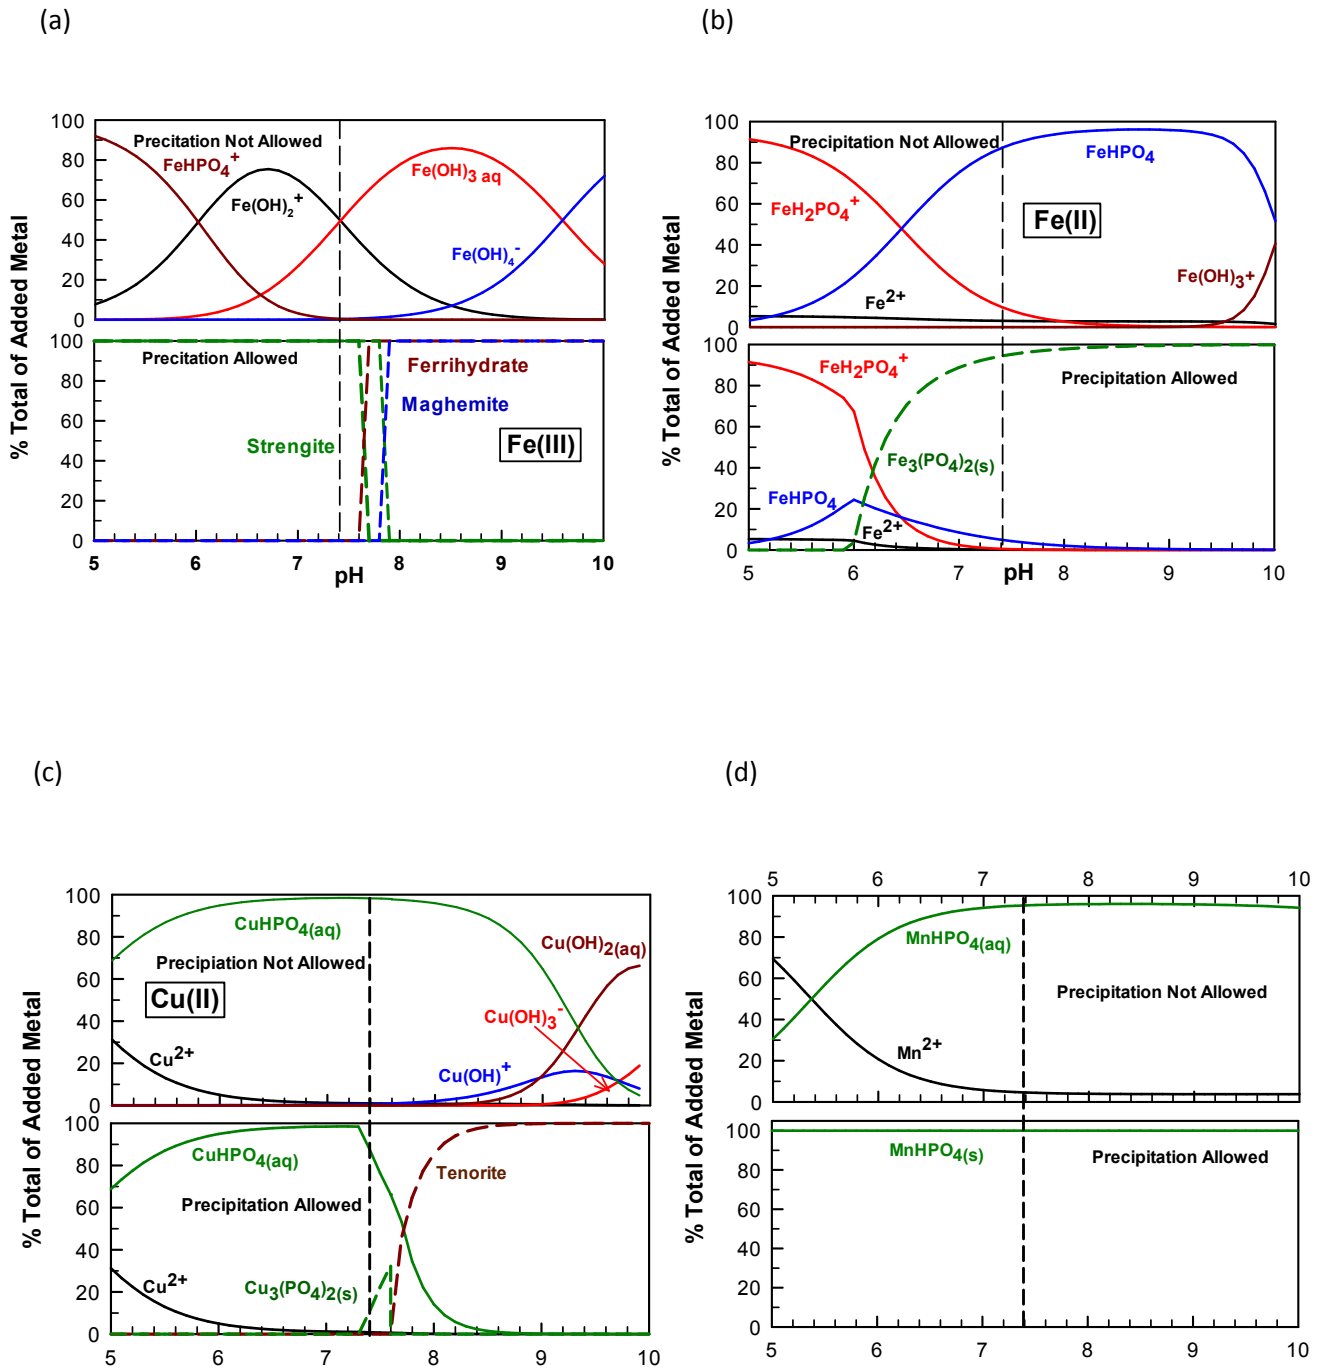

Figure S7. Effect of pH on metal speciation (a) Fe(III), (b) Fe(II), (c) Cu(II) and (d) Mn(II)

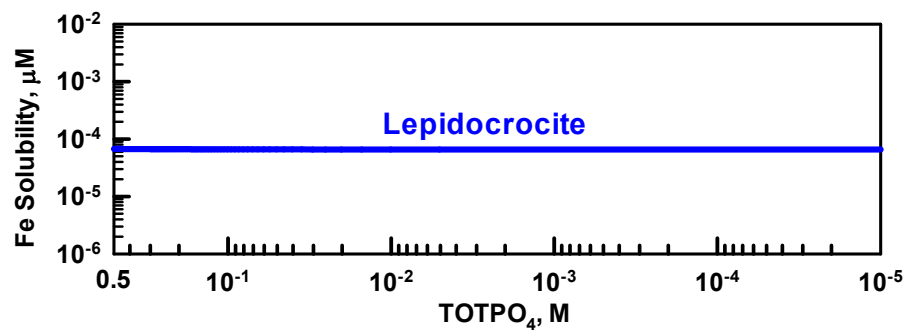

Figure S8. Fe(III) solubility versus TOTPO<sub>4</sub> for strengite- lepidocrocite

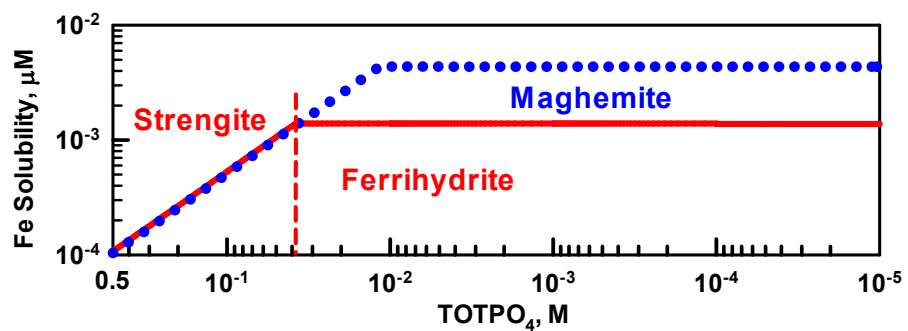

Figure S9. Fe(III) solubility versus TOTPO<sub>4</sub> for strengite-ferrihydrate (red) and strengite-maghemite (blue)

(a)

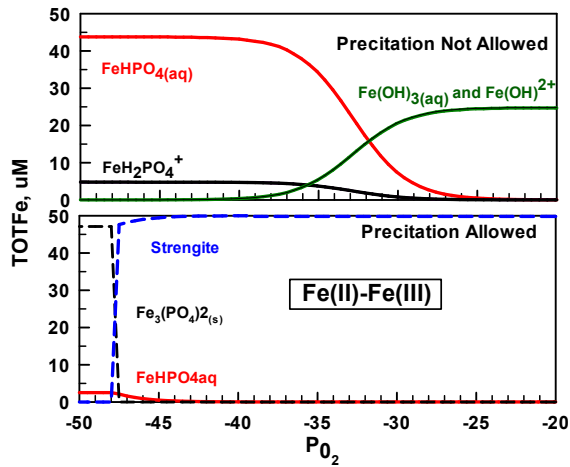

(b)

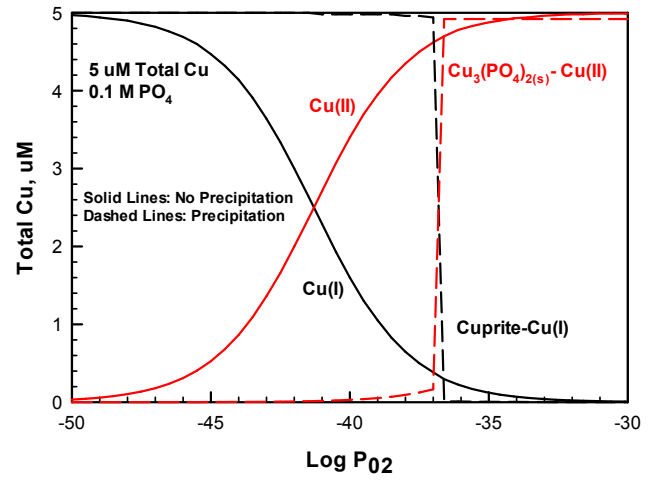

(c)

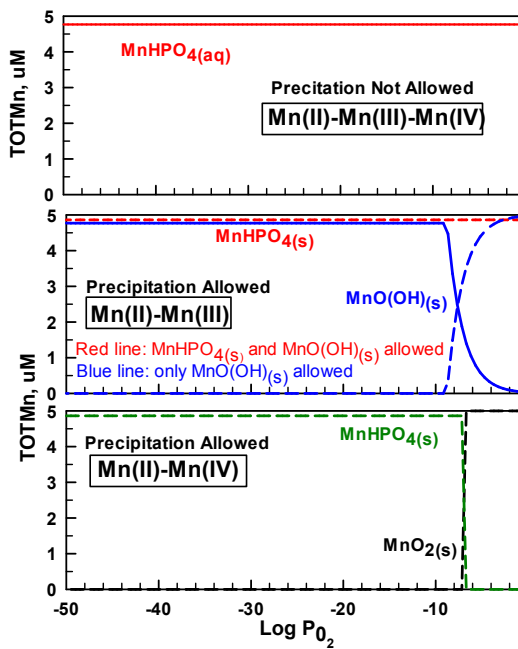

Figure S10. Effect of  $P_{O_2}$  on metal speciation: (a) Fe(II)-Fe(III), (b) Cu(I)-Cu(II) and (c) Mn(II)-Mn(III)-Mn(IV)

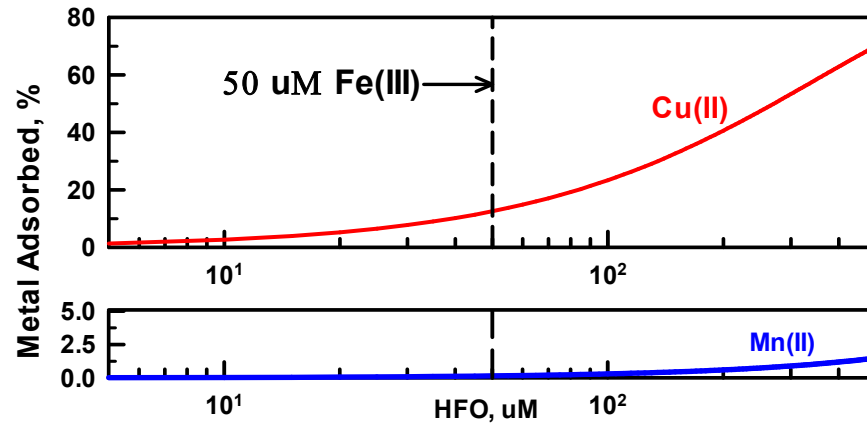

Figure S11. Adsorption of Cu(II) and Mn(II) by HFO: Function of Fe(III) concentration. TOTCu(II) = TOTMn(II) = 5  $\mu$ M
